# Supplementary material for: Efficiently selective oxidation of glycerol by BiQDs/BiOBr–Ov: promotion of molecular oxygen activation by Bi quantum dots and oxygen vacancies
Source: Royal Society of Chemistry journal article supplement (doi:10.1039/d1nj01927a), 2021-01-01
Supplement: d1nj01927a1.pdf [file d1nj01927a1.pdf]

## Supplementary information

### **Efficiently selective oxidation of glycerol by Bi<sub>QDs</sub>/BiOBr- O<sub>v</sub>: Promotion of molecular oxygen activation by Bi quantum dot and oxygen vacancy**

Chengguang Yue, Chenhao Li, Pingbo Zhang,\* Mingming Fan,\* Agus Haryono, Yan Leng,  
Yuming Dong and Pingping Jiang

(a)

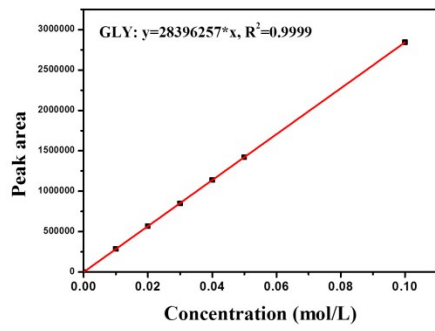

(b)

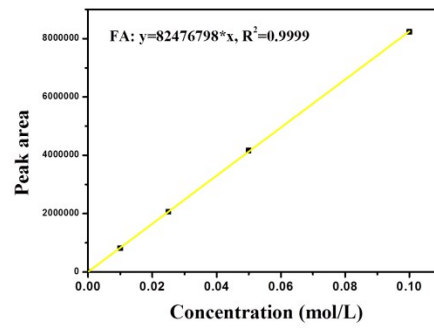

(c)

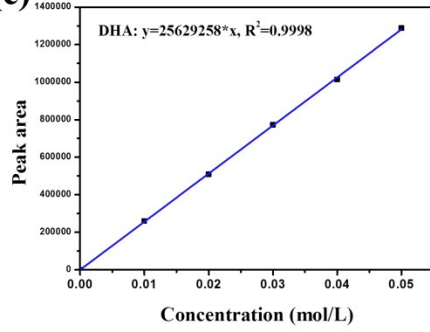

(d)

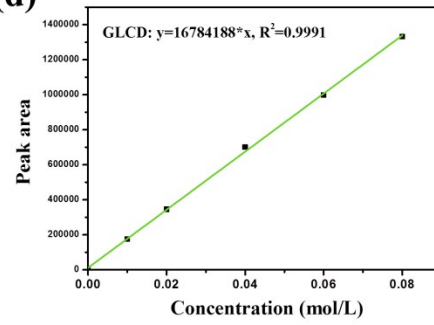

Fig. S1 Standard curves of glycerol and oxidation products

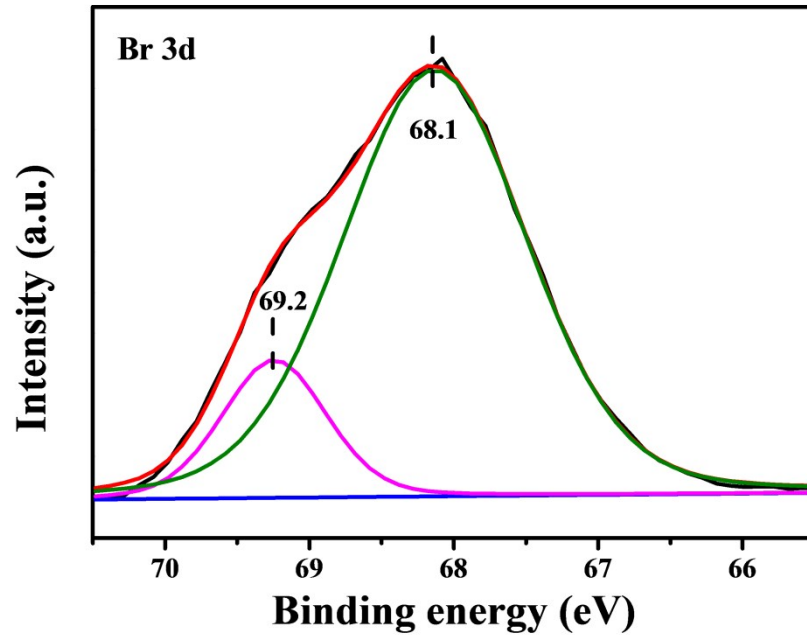

Fig. S2 XPS spectrum of Br in Bi<sub>QDs</sub>/BiOBr-O<sub>v</sub>
